# Supplementary material for: The crucial role of a spacer material on the efficiency of charge transfer processes in organic donor–acceptor junction solar cells
Source: Royal Society of Chemistry journal article supplement (doi:10.1039/c7nr07125f), 2017-12-04
Supplement: c7nr07125f1.pdf [file c7nr07125f1.pdf]

# **The Crucial Role of a Spacer Material on the Efficiency of Charge Transfer Processes in Organic Donor-Acceptor Junction Solar Cells**

## **Supplementary Information**

Reed Nieman,<sup>a</sup> Hsinhan Tsai,<sup>b</sup> Wanyi Nie,<sup>b</sup> Adelia J. A. Aquino,<sup>a,c</sup> Aditya D. Mohite,<sup>b</sup> Sergei Tretiak,<sup>\*,b</sup> Hao  
Li,<sup>d</sup> Hans Lischka<sup>\*,a,c</sup>

<sup>a</sup> Department of Chemistry and Biochemistry, Texas Tech University Lubbock, TX 79409-1061, USA

<sup>b</sup> Los Alamos National Laboratory, Los Alamos, New Mexico 87545, USA

<sup>c</sup> School of Pharmaceutical Sciences and Technology, Tianjin University, Tianjin, 300072 P.R.China

<sup>d</sup> Department of Chemistry, University of Houston, Houston, Texas 77204. USA

## Table of Contents:

---

|                                                                                        |         |
|----------------------------------------------------------------------------------------|---------|
| Computational Details                                                                  | S3      |
| Table S1: Vertical excitations of isolated standard trimer – 6-31G basis set           | S5      |
| Table S2: Vertical excitations of isolated standard trimer – 6-31G* basis set          | S6      |
| Table S3: Vertical excitations of isolated components – 6-31G* basis set               | S7      |
| Table S4: Vertical excitations of standard trimer – LR environ., 6-31G* basis set      | S8      |
| Table S5: Vertical excitations of standard trimer – LR environ., 6-31G basis set       | S9      |
| Table S6: Vertical excitations of standard trimer – SS environ., 6-31G* basis set      | S10     |
| Table S7: Vertical excitations of standard trimer – SS environ., 6-31G basis set       | S11     |
| Table S8: Vertical excitations of isolated standard trimer – 6-31G* basis, no freezing | S12     |
| Table S9: Vertical excitations of isolated extended trimer – 6-31G* basis set          | S13     |
| Table S10: Vertical excitations of isolated extended trimer – 6-31G basis set          | S15     |
| Table S11: Vertical excitations of extended trimer – SS environ., 6-31G basis set      | S17     |
| Cartesian coordinates of the standard and extended thiophene trimer systems            | S18-S27 |
| References                                                                             | S28     |

## Computational details

The two types of trimer structures are shown in Figure 1a (standard trimer) and Figure 1b,c (extended trimer). All structures were optimized as isolated complexes using DFT together with the Perdew–Burke–Ernzerhof (PBE)<sup>1</sup> functional, the SV(P)<sup>2</sup> basis, and the Multipole-Accelerated Resolution of the Identity for the Coulomb energy (MARI-J).<sup>3</sup> Empirical dispersion corrections were added by means of the D3<sup>4</sup> approach. Excited states were calculated using the long-range separated density functional, CAM-B3LYP, and two basis sets, 6-31G<sup>5</sup> and 6-31G\*<sup>6, 7</sup>. D3 dispersion corrections were used for the CAM-B3LYP TD-DFT calculations as well.

Full geometry optimizations of the standard and extended trimer structures would lead to distorted geometries which do not resemble the intended structural arrangements of a donor-spacer-C<sub>60</sub> interface since geometrical restrictions of the surrounding environment are missing. To achieve the desired model arrangement, geometry optimization was performed in steps and by freezing a few selected atoms (see Figure 1) to restrict the structural manifold. For the standard trimer, the C<sub>60</sub> and T3 monomers were combined and optimized freezing selected atoms. To this C<sub>60</sub>-T3 structure, P3HT was added as shown in Figure 1a. The whole complex (C<sub>60</sub>-T3-P3HT) was then optimized. The frozen atoms were located at the end of the chains and at the opposite side of C<sub>60</sub>, respectively, so that the subunits had sufficient flexibility to come in contact allowing the intersystem distances to be optimized. For the extended trimer, an analogous restricted geometry optimization technique was used as shown in Figure 2b, c.

Since the main objective of this investigation was to determine the relative stability of the CT states with excitations from the  $\pi$ -conjugated polymers to the C<sub>60</sub>s and the local excitations in the polymers, excitations within the fullerenes were suppressed in most of the calculations by freezing in the TD-DFT calculations the occupied orbitals located on the C<sub>60</sub> units. Otherwise, about a dozen of local excitations per C<sub>60</sub> unit would have impeded the already expensive calculations and would not have allowed the focus on the actual states of interest. In practice, all the core orbitals along with twenty percent of the highest occupied orbitals, which were localized at the C<sub>60</sub> and (C<sub>60</sub>)<sub>3</sub> units, were kept frozen. Comparison between full and frozen orbital calculations have been performed as well, showing good agreement in energetic ordering of the remaining states in the two calculations.

Solvent effects were taken into account using the conductor-like polarizable continuum model (C-PCM)<sup>8</sup>. Environmental effects on the electronically excited states were investigated on

the basis of the linear response (LR)<sup>9, 10</sup> and state-specific (SS)<sup>11</sup> approaches. In the LR approach, Hartree and exchange-correlation (XC) potentials are linearly expanded with respect to the variation of the time-dependent density of the ground state. In the SS method, the solvation field adapts to changes in the solute wave function for electronic excitations where the energy correction from fast electronic relaxation of the solvent is state-dependent. SS is considered more accurate for describing the excited electronic states<sup>12-14</sup> with charge distributions significantly different from the ground state such as with polar solvents or CT states in the solute. The SS method is computationally significantly more demanding though and requires that each state be calculated independently. As such, only five states were calculated using the CAM-B3LYP/6-31G\* method for the extended trimer which contained, however, representatives of the most important excitation types. For the extended trimer using the CAM-B3LYP/6-31G method, twenty states were calculated, and for the standard trimer using both basis sets, ten states were considered. Dichloromethane (dielectric constant,  $\epsilon=8.93$ , refractive index,  $n=1.42$ ) was chosen to act as a modestly polar environment.

Table S1: Excitation energies  $\Omega$  of the isolated standard C60-T3-P3HT system using the CAM-B3LYP/6-31G approach

| Exc.            | $\Omega$ (eV) | $f$  | CT   | Direction of CT      | Location of exciton |
|-----------------|---------------|------|------|----------------------|---------------------|
| S <sub>1</sub>  | 2.69          | 2.08 | 0.00 |                      | P3HT                |
| S <sub>2</sub>  | 2.83          | 0.00 | 0.97 | P3HT→C <sub>60</sub> |                     |
| S <sub>3</sub>  | 2.84          | 0.00 | 1.00 | P3HT→C <sub>60</sub> |                     |
| S <sub>4</sub>  | 2.85          | 0.00 | 0.99 | P3HT→C <sub>60</sub> |                     |
| S <sub>5</sub>  | 2.87          | 0.00 | 0.99 | T3→C <sub>60</sub>   |                     |
| S <sub>6</sub>  | 2.87          | 0.00 | 0.99 | T3→C <sub>60</sub>   |                     |
| S <sub>7</sub>  | 2.93          | 0.00 | 0.99 | T3→C <sub>60</sub>   |                     |
| S <sub>8</sub>  | 3.41          | 1.18 | 0.01 |                      | T3                  |
| S <sub>9</sub>  | 3.47          | 0.10 | 0.00 |                      | P3HT                |
| S <sub>10</sub> | 3.63          | 0.00 | 0.97 | P3HT→C <sub>60</sub> |                     |
| S <sub>11</sub> | 3.63          | 0.00 | 1.00 | P3HT→C <sub>60</sub> |                     |
| S <sub>12</sub> | 3.65          | 0.00 | 0.99 | P3HT→C <sub>60</sub> |                     |
| S <sub>13</sub> | 3.92          | 0.02 | 0.00 |                      | P3HT                |
| S <sub>14</sub> | 3.92          | 0.02 | 0.94 | T3→C <sub>60</sub>   |                     |
| S <sub>15</sub> | 3.93          | 0.01 | 0.94 | T3→C <sub>60</sub>   |                     |
| S <sub>16</sub> | 4.10          | 0.00 | 0.98 | P3HT→C <sub>60</sub> |                     |
| S <sub>17</sub> | 4.11          | 0.00 | 0.98 | P3HT→C <sub>60</sub> |                     |
| S <sub>18</sub> | 4.12          | 0.00 | 0.99 | P3HT→C <sub>60</sub> |                     |
| S <sub>19</sub> | 4.14          | 0.02 | 0.95 | T3→C <sub>60</sub>   |                     |
| S <sub>20</sub> | 4.16          | 0.00 | 0.99 | T3→C <sub>60</sub>   |                     |

Table S2: Excitation energies  $\Omega$  of the isolated standard C60-T3-P3HT system using the CAM-B3LYP/6-31G\* approach

| Exc.            | $\Omega$ (eV) | $f$  | CT   | Direction of CT      | Location of exciton |
|-----------------|---------------|------|------|----------------------|---------------------|
| S <sub>1</sub>  | 2.62          | 2.04 | 0.00 |                      | P3HT                |
| S <sub>2</sub>  | 2.91          | 0.00 | 0.97 | P3HT→C <sub>60</sub> |                     |
| S <sub>3</sub>  | 2.91          | 0.00 | 1.00 | P3HT→C <sub>60</sub> |                     |
| S <sub>4</sub>  | 2.92          | 0.00 | 0.99 | P3HT→C <sub>60</sub> |                     |
| S <sub>5</sub>  | 2.93          | 0.00 | 0.99 | T3→C <sub>60</sub>   |                     |
| S <sub>6</sub>  | 2.94          | 0.00 | 0.99 | T3→C <sub>60</sub>   |                     |
| S <sub>7</sub>  | 2.99          | 0.00 | 0.99 | T3→C <sub>60</sub>   |                     |
| S <sub>8</sub>  | 3.33          | 1.16 | 0.01 |                      | T3                  |
| S <sub>9</sub>  | 3.39          | 0.10 | 0.00 |                      | P3HT                |
| S <sub>10</sub> | 3.70          | 0.00 | 0.97 | P3HT→C <sub>60</sub> |                     |
| S <sub>11</sub> | 3.70          | 0.00 | 1.00 | P3HT→C <sub>60</sub> |                     |
| S <sub>12</sub> | 3.71          | 0.00 | 0.99 | P3HT→C <sub>60</sub> |                     |
| S <sub>13</sub> | 3.87          | 0.02 | 0.00 |                      | P3HT                |
| S <sub>14</sub> | 3.99          | 0.02 | 0.94 | T3→C <sub>60</sub>   |                     |
| S <sub>15</sub> | 3.99          | 0.03 | 0.94 | T3→C <sub>60</sub>   |                     |
| S <sub>16</sub> | 4.20          | 0.03 | 0.95 | T3→C <sub>60</sub>   |                     |
| S <sub>17</sub> | 4.23          | 0.00 | 0.98 | P3HT→C <sub>60</sub> |                     |
| S <sub>18</sub> | 4.24          | 0.00 | 0.98 | P3HT→C <sub>60</sub> |                     |
| S <sub>19</sub> | 4.25          | 0.00 | 0.99 | P3HT→C <sub>60</sub> |                     |
| S <sub>20</sub> | 4.27          | 0.00 | 0.99 | T3→C <sub>60</sub>   |                     |

Table S3: Lowest excitation energies  $\Omega$  of the isolated components P3HT, T3 and C60 using the CAM-B3LYP/6-31G\* approach.

| Exc.            | $\Omega$ (eV) | $f$  |
|-----------------|---------------|------|
| P3HT            |               |      |
| S <sub>1</sub>  | 2.62          | 2.10 |
| S <sub>2</sub>  | 3.39          | 0.00 |
| S <sub>3</sub>  | 3.87          | 0.02 |
| S <sub>4</sub>  | 4.06          | 0.14 |
| S <sub>5</sub>  | 4.49          | 0.01 |
| S <sub>6</sub>  | 4.63          | 0.00 |
| S <sub>7</sub>  | 4.84          | 0.04 |
| S <sub>8</sub>  | 4.86          | 0.00 |
| S <sub>9</sub>  | 4.89          | 0.00 |
| S <sub>10</sub> | 4.93          | 0.01 |
| T3              |               |      |
| S <sub>1</sub>  | 3.30          | 1.09 |
| S <sub>2</sub>  | 4.54          | 0.00 |
| S <sub>3</sub>  | 4.91          | 0.00 |
| S <sub>4</sub>  | 5.07          | 0.00 |
| S <sub>5</sub>  | 5.13          | 0.00 |
| S <sub>6</sub>  | 5.15          | 0.01 |
| S <sub>7</sub>  | 5.24          | 0.01 |
| S <sub>8</sub>  | 5.30          | 0.06 |
| S <sub>9</sub>  | 5.41          | 0.00 |
| S <sub>10</sub> | 5.43          | 0.02 |
| C60             |               |      |
| S <sub>1</sub>  | 2.47          | 0.00 |
| S <sub>2</sub>  | 2.47          | 0.00 |
| S <sub>3</sub>  | 2.47          | 0.00 |
| S <sub>4</sub>  | 2.53          | 0.00 |
| S <sub>5</sub>  | 2.53          | 0.00 |
| S <sub>6</sub>  | 2.53          | 0.00 |
| S <sub>7</sub>  | 2.56          | 0.00 |
| S <sub>8</sub>  | 2.56          | 0.00 |
| S <sub>9</sub>  | 2.56          | 0.00 |
| S <sub>10</sub> | 2.57          | 0.00 |

Table S4: Excitation energies  $\Omega$  of the standard C60-T3-P3HT system the using the CAM-B3LYP/6-31G\* approach in the LR environment

| Exc.            | $\Omega$ (eV) | $f$  | CT   | Direction of CT      | Location of exciton |
|-----------------|---------------|------|------|----------------------|---------------------|
| S <sub>1</sub>  | 2.53          | 2.22 | 0.00 |                      | P3HT                |
| S <sub>2</sub>  | 3.12          | 0.00 | 0.97 | P3HT→C <sub>60</sub> |                     |
| S <sub>3</sub>  | 3.12          | 0.00 | 1.00 | P3HT→C <sub>60</sub> |                     |
| S <sub>4</sub>  | 3.13          | 0.00 | 0.99 | P3HT→C <sub>60</sub> |                     |
| S <sub>5</sub>  | 3.22          | 0.60 | 0.57 | T3→C <sub>60</sub>   |                     |
| S <sub>6</sub>  | 3.23          | 0.14 | 0.90 | T3→C <sub>60</sub>   |                     |
| S <sub>7</sub>  | 3.24          | 0.48 | 0.56 | T3→C <sub>60</sub>   |                     |
| S <sub>8</sub>  | 3.27          | 0.10 | 0.00 |                      | P3HT                |
| S <sub>9</sub>  | 3.29          | 0.02 | 0.99 | T3→C <sub>60</sub>   |                     |
| S <sub>10</sub> | 3.87          | 0.01 | 0.00 |                      | P3HT                |
| S <sub>11</sub> | 3.91          | 0.00 | 0.97 | P3HT→C <sub>60</sub> |                     |
| S <sub>12</sub> | 3.91          | 0.00 | 1.00 | P3HT→C <sub>60</sub> |                     |
| S <sub>13</sub> | 3.92          | 0.00 | 0.99 | P3HT→C <sub>60</sub> |                     |
| S <sub>14</sub> | 3.98          | 0.19 | 0.00 |                      | P3HT                |
| S <sub>15</sub> | 4.28          | 0.01 | 0.85 | T3→C <sub>60</sub>   |                     |
| S <sub>16</sub> | 4.29          | 0.13 | 0.86 | T3→C <sub>60</sub>   |                     |
| S <sub>17</sub> | 4.37          | 0.00 | 1.00 | P3HT→T3              |                     |
| S <sub>18</sub> | 4.45          | 0.00 | 0.97 | P3HT→C <sub>60</sub> |                     |
| S <sub>19</sub> | 4.45          | 0.00 | 0.99 | P3HT→C <sub>60</sub> |                     |
| S <sub>20</sub> | 4.46          | 0.00 | 0.99 | P3HT→C <sub>60</sub> |                     |



Table S5: Excitation energies  $\Omega$  of the standard C60-T3-P3HT system the using the CAM-B3LYP/6-31G approach in the LR environment

| Exc.            | $\Omega$ (eV) | $f$  | CT   | Direction of CT      | Location of exciton |
|-----------------|---------------|------|------|----------------------|---------------------|
| S <sub>1</sub>  | 2.60          | 2.26 | 0.0  |                      | P3HT                |
| S <sub>2</sub>  | 3.08          | 0.00 | 0.97 | P3HT→C <sub>60</sub> |                     |
| S <sub>3</sub>  | 3.08          | 0.00 | 1.00 | P3HT→C <sub>60</sub> |                     |
| S <sub>4</sub>  | 3.09          | 0.00 | 0.98 | P3HT→C <sub>60</sub> |                     |
| S <sub>5</sub>  | 3.20          | 0.01 | 0.99 | T3→C <sub>60</sub>   |                     |
| S <sub>6</sub>  | 3.21          | 0.01 | 0.99 | T3→C <sub>60</sub>   |                     |
| S <sub>7</sub>  | 3.27          | 0.02 | 0.99 | T3→C <sub>60</sub>   |                     |
| S <sub>8</sub>  | 3.32          | 1.21 | 0.01 |                      | T3                  |
| S <sub>9</sub>  | 3.35          | 0.09 | 0.00 |                      | P3HT                |
| S <sub>10</sub> | 3.87          | 0.00 | 0.97 | P3HT→C <sub>60</sub> |                     |
| S <sub>11</sub> | 3.88          | 0.00 | 1.00 | P3HT→C <sub>60</sub> |                     |
| S <sub>12</sub> | 3.89          | 0.00 | 0.98 | P3HT→C <sub>60</sub> |                     |
| S <sub>13</sub> | 3.92          | 0.01 | 0.00 |                      | P3HT                |
| S <sub>14</sub> | 4.08          | 0.20 | 0.00 |                      | P3HT                |
| S <sub>15</sub> | 4.28          | 0.05 | 0.91 | T3→C <sub>60</sub>   |                     |
| S <sub>16</sub> | 4.28          | 0.04 | 0.91 | T3→C <sub>60</sub>   |                     |
| S <sub>17</sub> | 4.35          | 0.00 | 1.00 | P3HT→C <sub>60</sub> |                     |
| S <sub>18</sub> | 4.35          | 0.00 | 0.98 | P3HT→C <sub>60</sub> |                     |
| S <sub>19</sub> | 4.36          | 0.00 | 0.99 | P3HT→C <sub>60</sub> |                     |
| S <sub>20</sub> | 4.40          | 0.00 | 1.00 | P3HT→T3              |                     |

Table S6: Excitation energies  $\Omega$  of the standard C60-T3-P3HT system using the CAM-B3LYP/6-31G\* approach in the SS environment

| Exc.            | $\Omega$ (eV) | $f$  | Direction of CT      | Location of Exciton |
|-----------------|---------------|------|----------------------|---------------------|
| S <sub>1</sub>  | 1.29          | 0.00 | P3HT→C <sub>60</sub> |                     |
| S <sub>2</sub>  | 1.29          | 0.00 | P3HT→C <sub>60</sub> |                     |
| S <sub>3</sub>  | 1.29          | 0.00 | P3HT→C <sub>60</sub> |                     |
| S <sub>4</sub>  | 1.29          | 0.00 | P3HT→C <sub>60</sub> |                     |
| S <sub>5</sub>  | 1.88          | 0.00 | T3→C <sub>60</sub>   |                     |
| S <sub>6</sub>  | 1.88          | 0.00 | T3→C <sub>60</sub>   |                     |
| S <sub>7</sub>  | 1.88          | 0.00 | T3→C <sub>60</sub>   |                     |
| S <sub>8</sub>  | 1.88          | 0.00 | T3→C <sub>60</sub>   |                     |
| S <sub>9</sub>  | 1.90          | 0.00 | T3→C <sub>60</sub>   |                     |
| S <sub>10</sub> | 2.63          | 2.04 |                      | P3HT                |

Table S7: Excitation energies  $\Omega$  of the standard C60-T3-P3HT system using the CAM-B3LYP/6-31G approach in the SS environment

| Exc.            | $\Omega$ (eV) | $f$  | CT   | Direction of CT      | Location of Exciton |
|-----------------|---------------|------|------|----------------------|---------------------|
| S <sub>1</sub>  | 1.23          | 0.00 | 1.00 | P3HT→C <sub>60</sub> |                     |
| S <sub>2</sub>  | 1.23          | 0.00 | 1.00 | P3HT→C <sub>60</sub> |                     |
| S <sub>3</sub>  | 1.24          | 0.00 | 1.00 | P3HT→C <sub>60</sub> |                     |
| S <sub>4</sub>  | 1.84          | 0.00 | 1.00 | T3→C <sub>60</sub>   |                     |
| S <sub>5</sub>  | 1.84          | 0.00 | 1.00 | T3→C <sub>60</sub>   |                     |
| S <sub>6</sub>  | 1.86          | 0.00 | 1.00 | T3→C <sub>60</sub>   |                     |
| S <sub>7</sub>  | 2.06          | 0.00 | 1.00 | P3HT→C <sub>60</sub> |                     |
| S <sub>8</sub>  | 2.06          | 0.00 | 1.00 | P3HT→C <sub>60</sub> |                     |
| S <sub>9</sub>  | 2.07          | 0.00 | 1.00 | P3HT→C <sub>60</sub> |                     |
| S <sub>10</sub> | 2.70          | 2.07 | 0.00 |                      | P3HT                |

Table S8: Excitation energies  $\Omega$  of the isolated standard C60-T3-P3HT system using the CAM-B3LYP/6-31G\* approach (only core orbitals were frozen)

| Exc.            | $\Omega$ (eV) | $f$  | CT   | Direction of CT      | Location of exciton |
|-----------------|---------------|------|------|----------------------|---------------------|
| S <sub>1</sub>  | 2.47          | 0.00 | 0.01 |                      | C60                 |
| S <sub>2</sub>  | 2.47          | 0.00 | 0.00 |                      | C60                 |
| S <sub>3</sub>  | 2.48          | 0.00 | 0.01 |                      | C60                 |
| S <sub>4</sub>  | 2.52          | 0.00 | 0.01 |                      | C60                 |
| S <sub>5</sub>  | 2.53          | 0.00 | 0.00 |                      | C60                 |
| S <sub>6</sub>  | 2.53          | 0.00 | 0.01 |                      | C60                 |
| S <sub>7</sub>  | 2.56          | 0.00 | 0.01 |                      | C60                 |
| S <sub>8</sub>  | 2.56          | 0.00 | 0.01 |                      | C60                 |
| S <sub>9</sub>  | 2.57          | 0.00 | 0.00 |                      | C60                 |
| S <sub>10</sub> | 2.57          | 0.00 | 0.00 |                      | C60                 |
| S <sub>11</sub> | 2.62          | 2.03 | 0.00 |                      | P3HT                |
| S <sub>12</sub> | 2.84          | 0.00 | 0.01 |                      | C60                 |
| S <sub>13</sub> | 2.85          | 0.00 | 0.01 |                      | C60                 |
| S <sub>14</sub> | 2.85          | 0.00 | 0.01 |                      | C60                 |
| S <sub>15</sub> | 2.86          | 0.00 | 0.01 |                      | C60                 |
| S <sub>16</sub> | 2.86          | 0.00 | 0.01 |                      | C60                 |
| S <sub>17</sub> | 2.91          | 0.00 | 1.00 | P3HT→C <sub>60</sub> |                     |
| S <sub>18</sub> | 2.91          | 0.00 | 1.00 | P3HT→C <sub>60</sub> |                     |
| S <sub>19</sub> | 2.92          | 0.00 | 1.00 | P3HT→C <sub>60</sub> |                     |
| S <sub>20</sub> | 2.93          | 0.00 | 1.00 | T3→C <sub>60</sub>   |                     |

Table S9: Excitation energies  $\Omega$  of the isolated extended (C60)<sub>3</sub>-(T3)<sub>3</sub>-P3HT system using the CAM-B3LYP/6-31G\* approach

| Exc.              | $\Omega$ (eV) | $f$  | CT   | Direction of CT                       | Location of exciton |
|-------------------|---------------|------|------|---------------------------------------|---------------------|
| 1 <sup>1</sup> A  | 2.33          | 0.00 | 1.00 | (T3) <sub>3</sub> →(C60) <sub>3</sub> | P3HT                |
| 2 <sup>1</sup> A  | 2.37          | 0.00 | 1.00 | (T3) <sub>3</sub> →(C60) <sub>3</sub> |                     |
| 3 <sup>1</sup> A  | 2.38          | 0.00 | 1.00 | (T3) <sub>3</sub> →(C60) <sub>3</sub> |                     |
| 4 <sup>1</sup> A  | 2.56          | 0.01 | 0.99 | (T3) <sub>3</sub> →(C60) <sub>3</sub> |                     |
| 5 <sup>1</sup> A  | 2.59          | 0.00 | 1.00 | (T3) <sub>3</sub> →(C60) <sub>3</sub> |                     |
| 6 <sup>1</sup> A  | 2.62          | 0.00 | 0.99 | (T3) <sub>3</sub> →(C60) <sub>3</sub> |                     |
| 7 <sup>1</sup> A  | 2.67          | 1.92 | 0.00 |                                       |                     |
| 8 <sup>1</sup> A  | 2.74          | 0.00 | 1.00 | (T3) <sub>3</sub> →(C60) <sub>3</sub> |                     |
| 9 <sup>1</sup> A  | 2.75          | 0.00 | 1.00 | (T3) <sub>3</sub> →(C60) <sub>3</sub> |                     |
| 10 <sup>1</sup> A | 2.76          | 0.00 | 1.00 | (T3) <sub>3</sub> →(C60) <sub>3</sub> |                     |
| 11 <sup>1</sup> A | 2.78          | 0.00 | 1.00 | (T3) <sub>3</sub> →(C60) <sub>3</sub> |                     |
| 12 <sup>1</sup> A | 2.79          | 0.00 | 0.99 | (T3) <sub>3</sub> →(C60) <sub>3</sub> |                     |
| 13 <sup>1</sup> A | 2.80          | 0.00 | 1.00 | (T3) <sub>3</sub> →(C60) <sub>3</sub> |                     |
| 14 <sup>1</sup> A | 2.81          | 0.00 | 0.98 | (T3) <sub>3</sub> →(C60) <sub>3</sub> |                     |
| 15 <sup>1</sup> A | 2.82          | 0.00 | 1.00 | (T3) <sub>3</sub> →(C60) <sub>3</sub> |                     |
| 16 <sup>1</sup> A | 2.82          | 0.00 | 1.00 | P3HT→(C60) <sub>3</sub>               |                     |
| 17 <sup>1</sup> A | 2.83          | 0.00 | 1.00 | (T3) <sub>3</sub> →(C60) <sub>3</sub> |                     |
| 18 <sup>1</sup> A | 2.85          | 0.00 | 1.00 | P3HT→(C60) <sub>3</sub>               |                     |
| 19 <sup>1</sup> A | 2.89          | 0.00 | 1.00 | P3HT→(C60) <sub>3</sub>               |                     |
| 20 <sup>1</sup> A | 2.96          | 0.00 | 0.97 | (T3) <sub>3</sub> →(C60) <sub>3</sub> |                     |
| 21 <sup>1</sup> A | 2.96          | 0.00 | 0.99 | (T3) <sub>3</sub> →(C60) <sub>3</sub> |                     |
| 22 <sup>1</sup> A | 2.97          | 0.00 | 0.98 | (T3) <sub>3</sub> →(C60) <sub>3</sub> |                     |
| 23 <sup>1</sup> A | 3.02          | 0.00 | 1.00 | (T3) <sub>3</sub> →(C60) <sub>3</sub> |                     |
| 24 <sup>1</sup> A | 3.04          | 0.00 | 1.00 | (T3) <sub>3</sub> →(C60) <sub>3</sub> |                     |
| 25 <sup>1</sup> A | 3.05          | 0.00 | 1.00 | (T3) <sub>3</sub> →(C60) <sub>3</sub> |                     |
| 26 <sup>1</sup> A | 3.06          | 0.00 | 1.00 | P3HT→(C60) <sub>3</sub>               |                     |
| 27 <sup>1</sup> A | 3.07          | 0.00 | 1.00 | P3HT→(C60) <sub>3</sub>               |                     |
| 28 <sup>1</sup> A | 3.08          | 0.00 | 1.00 | P3HT→(C60) <sub>3</sub>               |                     |
| 29 <sup>1</sup> A | 3.10          | 0.00 | 0.10 |                                       | (T3) <sub>3</sub>   |
| 30 <sup>1</sup> A | 3.14          | 0.00 | 1.00 | (T3) <sub>3</sub> →(C60) <sub>3</sub> |                     |
| 31 <sup>1</sup> A | 3.15          | 0.00 | 1.00 | (T3) <sub>3</sub> →(C60) <sub>3</sub> |                     |
| 32 <sup>1</sup> A | 3.15          | 0.00 | 1.00 | P3HT→(C60) <sub>3</sub>               |                     |
| 33 <sup>1</sup> A | 3.16          | 0.00 | 1.00 | P3HT→(C60) <sub>3</sub>               |                     |

|                   |      |      |      |                                                    |                        |
|-------------------|------|------|------|----------------------------------------------------|------------------------|
| 34 <sup>1</sup> A | 3.16 | 0.00 | 1.00 | (T3) <sub>3</sub> →(C <sub>60</sub> ) <sub>3</sub> |                        |
| 35 <sup>1</sup> A | 3.17 | 0.00 | 1.00 | P3HT→(C <sub>60</sub> ) <sub>3</sub>               |                        |
| 36 <sup>1</sup> A | 3.26 | 0.07 | 0.03 |                                                    | (T3) <sub>3</sub>      |
| 37 <sup>1</sup> A | 3.28 | 0.00 | 0.99 | (T3) <sub>3</sub> →(C <sub>60</sub> ) <sub>3</sub> |                        |
| 38 <sup>1</sup> A | 3.29 | 0.00 | 0.99 | (T3) <sub>3</sub> →(C <sub>60</sub> ) <sub>3</sub> |                        |
| 39 <sup>1</sup> A | 3.29 | 0.00 | 0.97 | (T3) <sub>3</sub> →(C <sub>60</sub> ) <sub>3</sub> |                        |
| 40 <sup>1</sup> A | 3.43 | 1.38 | 0.03 |                                                    | P3HT/(T3) <sub>3</sub> |

Table S10: Excitation energies  $\Omega$  of the isolated extended (C60)<sub>3</sub>-(T3)<sub>3</sub>-P3HT system using the CAM-B3LYP/6-31G approach

| Exc.            | $\Omega$ (eV) | $f$  | CT   | Direction of CT                       | Location of exciton |
|-----------------|---------------|------|------|---------------------------------------|---------------------|
| S <sub>1</sub>  | 2.24          | 0.00 | 1.00 | (T3) <sub>3</sub> →(C60) <sub>3</sub> |                     |
| S <sub>2</sub>  | 2.28          | 0.00 | 1.00 | (T3) <sub>3</sub> →(C60) <sub>3</sub> |                     |
| S <sub>3</sub>  | 2.30          | 0.00 | 1.00 | (T3) <sub>3</sub> →(C60) <sub>3</sub> |                     |
| S <sub>4</sub>  | 2.47          | 0.01 | 0.99 | (T3) <sub>3</sub> →(C60) <sub>3</sub> |                     |
| S <sub>5</sub>  | 2.51          | 0.00 | 1.00 | (T3) <sub>3</sub> →(C60) <sub>3</sub> |                     |
| S <sub>6</sub>  | 2.54          | 0.00 | 1.00 | (T3) <sub>3</sub> →(C60) <sub>3</sub> |                     |
| S <sub>7</sub>  | 2.68          | 0.00 | 1.00 | (T3) <sub>3</sub> →(C60) <sub>3</sub> |                     |
| S <sub>8</sub>  | 2.69          | 0.00 | 1.00 | (T3) <sub>3</sub> →(C60) <sub>3</sub> |                     |
| S <sub>9</sub>  | 2.70          | 0.00 | 1.00 | (T3) <sub>3</sub> →(C60) <sub>3</sub> |                     |
| S <sub>10</sub> | 2.71          | 0.00 | 1.00 | (T3) <sub>3</sub> →(C60) <sub>3</sub> |                     |
| S <sub>11</sub> | 2.72          | 0.00 | 1.00 | (T3) <sub>3</sub> →(C60) <sub>3</sub> |                     |
| S <sub>12</sub> | 2.73          | 0.00 | 1.00 | (T3) <sub>3</sub> →(C60) <sub>3</sub> |                     |
| S <sub>13</sub> | 2.73          | 0.00 | 1.00 | P3HT→(C60) <sub>3</sub>               |                     |
| S <sub>14</sub> | 2.74          | 1.96 | 0.00 |                                       | P3HT                |
| S <sub>15</sub> | 2.75          | 0.00 | 0.98 | (T3) <sub>3</sub> →(C60) <sub>3</sub> |                     |
| S <sub>16</sub> | 2.75          | 0.00 | 1.00 | (T3) <sub>3</sub> →(C60) <sub>3</sub> |                     |
| S <sub>17</sub> | 2.76          | 0.00 | 1.00 | P3HT→(C60) <sub>3</sub>               |                     |
| S <sub>18</sub> | 2.77          | 0.00 | 0.97 | (T3) <sub>3</sub> →(C60) <sub>3</sub> |                     |
| S <sub>19</sub> | 2.79          | 0.00 | 1.00 | P3HT→(C60) <sub>3</sub>               |                     |
| S <sub>20</sub> | 2.92          | 0.00 | 0.98 | (T3) <sub>3</sub> →(C60) <sub>3</sub> |                     |
| S <sub>21</sub> | 2.92          | 0.00 | 1.00 | (T3) <sub>3</sub> →(C60) <sub>3</sub> |                     |
| S <sub>22</sub> | 2.93          | 0.00 | 0.97 | (T3) <sub>3</sub> →(C60) <sub>3</sub> |                     |
| S <sub>23</sub> | 2.96          | 0.00 | 1.00 | (T3) <sub>3</sub> →(C60) <sub>3</sub> |                     |
| S <sub>24</sub> | 2.97          | 0.00 | 1.00 | (T3) <sub>3</sub> →(C60) <sub>3</sub> |                     |
| S <sub>25</sub> | 2.99          | 0.00 | 1.00 | (T3) <sub>3</sub> →(C60) <sub>3</sub> |                     |
| S <sub>26</sub> | 3.00          | 0.00 | 1.00 | P3HT→(C60) <sub>3</sub>               |                     |
| S <sub>27</sub> | 3.01          | 0.00 | 1.00 | P3HT→(C60) <sub>3</sub>               |                     |
| S <sub>28</sub> | 3.02          | 0.00 | 1.00 | P3HT→(C60) <sub>3</sub>               |                     |
| S <sub>29</sub> | 3.07          | 0.00 | 1.00 | (T3) <sub>3</sub> →(C60) <sub>3</sub> |                     |
| S <sub>30</sub> | 3.08          | 0.00 | 1.00 | (T3) <sub>3</sub> →(C60) <sub>3</sub> |                     |
| S <sub>31</sub> | 3.09          | 0.00 | 1.00 | (T3) <sub>3</sub> →(C60) <sub>3</sub> |                     |
| S <sub>32</sub> | 3.10          | 0.00 | 1.00 | P3HT→(C60) <sub>3</sub>               |                     |
| S <sub>33</sub> | 3.11          | 0.00 | 1.00 | P3HT→(C60) <sub>3</sub>               |                     |
| S <sub>34</sub> | 3.11          | 0.00 | 1.00 | P3HT→(C60) <sub>3</sub>               |                     |

|                 |      |      |      |                                                    |                   |
|-----------------|------|------|------|----------------------------------------------------|-------------------|
| S <sub>35</sub> | 3.15 | 0.00 | 0.11 |                                                    | (T3) <sub>3</sub> |
| S <sub>36</sub> | 3.23 | 0.00 | 0.99 | (T3) <sub>3</sub> →(C <sub>60</sub> ) <sub>3</sub> |                   |
| S <sub>37</sub> | 3.23 | 0.00 | 0.99 | (T3) <sub>3</sub> →(C <sub>60</sub> ) <sub>3</sub> |                   |
| S <sub>38</sub> | 3.24 | 0.00 | 0.97 | (T3) <sub>3</sub> →(C <sub>60</sub> ) <sub>3</sub> |                   |
| S <sub>39</sub> | 3.32 | 0.10 | 0.03 |                                                    | (T3) <sub>3</sub> |
| S <sub>40</sub> | 3.49 | 1.97 | 0.08 |                                                    | (T3) <sub>3</sub> |



Table S11: Excitation energies  $\Omega$  of the extended C60-T3-P3HT system using the CAM-B3LYP/6-31G approach in the SS environment

| Exc.            | $\Omega$ (eV)     | $f$  | CT   | Direction of CT                                    | Location of exciton |
|-----------------|-------------------|------|------|----------------------------------------------------|---------------------|
| S <sub>1</sub>  | 1.59              | 0.00 | 1.00 | P3HT→(C <sub>60</sub> ) <sub>3</sub>               |                     |
| S <sub>2</sub>  | 1.59              | 0.00 | 1.00 | P3HT→(C <sub>60</sub> ) <sub>3</sub>               |                     |
| S <sub>3</sub>  | 1.60              | 0.00 | 1.00 | P3HT→(C <sub>60</sub> ) <sub>3</sub>               |                     |
| S <sub>4</sub>  | 1.61              | 0.00 | 1.00 | P3HT→(C <sub>60</sub> ) <sub>3</sub>               |                     |
| S <sub>5</sub>  | 1.77              | 0.00 | 1.00 | (T3) <sub>3</sub> →(C <sub>60</sub> ) <sub>3</sub> |                     |
| S <sub>6</sub>  | 1.77 <sup>a</sup> | 0.00 | 1.00 | (T3) <sub>3</sub> →(C <sub>60</sub> ) <sub>3</sub> |                     |
| S <sub>7</sub>  | 1.88              | 0.00 | 1.00 | (T3) <sub>3</sub> →(C <sub>60</sub> ) <sub>3</sub> |                     |
| S <sub>8</sub>  | 1.91              | 0.00 | 1.00 | (T3) <sub>3</sub> →(C <sub>60</sub> ) <sub>3</sub> |                     |
| S <sub>9</sub>  | 1.91              | 0.00 | 1.00 | (T3) <sub>3</sub> →(C <sub>60</sub> ) <sub>3</sub> |                     |
| S <sub>10</sub> | 1.91              | 0.00 | 1.00 | (T3) <sub>3</sub> →(C <sub>60</sub> ) <sub>3</sub> |                     |
| S <sub>11</sub> | 1.91              | 0.00 | 1.00 | (T3) <sub>3</sub> →(C <sub>60</sub> ) <sub>3</sub> |                     |
| S <sub>12</sub> | 2.10              | 0.00 | 1.00 | (T3) <sub>3</sub> →(C <sub>60</sub> ) <sub>3</sub> |                     |
| S <sub>13</sub> | 2.10              | 0.00 | 1.00 | (T3) <sub>3</sub> →(C <sub>60</sub> ) <sub>3</sub> |                     |
| S <sub>14</sub> | 2.10              | 0.00 | 1.00 | (T3) <sub>3</sub> →(C <sub>60</sub> ) <sub>3</sub> |                     |
| S <sub>15</sub> | 2.12              | 0.00 | 1.00 | (T3) <sub>3</sub> →(C <sub>60</sub> ) <sub>3</sub> |                     |
| S <sub>16</sub> | 2.12              | 0.00 | 1.00 | (T3) <sub>3</sub> →(C <sub>60</sub> ) <sub>3</sub> |                     |
| S <sub>17</sub> | 2.13              | 0.00 | 1.00 | (T3) <sub>3</sub> →(C <sub>60</sub> ) <sub>3</sub> |                     |
| S <sub>18</sub> | 2.13              | 0.00 | 1.00 | (T3) <sub>3</sub> →(C <sub>60</sub> ) <sub>3</sub> |                     |
| S <sub>19</sub> | 2.21 <sup>b</sup> | 0.00 | 1.00 | (T3) <sub>3</sub> →(C <sub>60</sub> ) <sub>3</sub> |                     |
| S <sub>20</sub> | 2.75              | 1.92 | 0.00 |                                                    | P3HT                |

<sup>a</sup>Excitation energy averaged over two oscillating energies: 1.77 eV and 1.76 eV, <sup>b</sup>Excitation energy averaged over three oscillating energies: 2.12 eV, 2.21 eV, 2.29 eV

Cartesian coordinates of the standard thiophene trimer optimized using the PBE/SV(P) method

|   |            |            |            |
|---|------------|------------|------------|
| C | 3.1788433  | -3.3404777 | 8.7294822  |
| C | 2.1629913  | 1.9236048  | 4.2388618  |
| C | 4.1932961  | -2.6019358 | 9.3660229  |
| C | 3.1778863  | 2.6620684  | 4.8745973  |
| C | 0.9111888  | 0.5207736  | 9.4177558  |
| C | 5.6498111  | -2.2595722 | 5.0899862  |
| C | 0.7072100  | 1.5797260  | 8.5142357  |
| C | 5.4457160  | -1.2004282 | 4.1863733  |
| C | 5.2231193  | 1.7759497  | 8.8185697  |
| C | 6.1760029  | 1.2165311  | 7.9477714  |
| C | 1.7887723  | -2.9153880 | 8.8404798  |
| C | 3.3868397  | -3.8532528 | 7.3812431  |
| C | 0.9038546  | 1.6708448  | 4.9280168  |
| C | 3.8543610  | -1.4115747 | 10.1364448 |
| C | 2.5027054  | 0.7326668  | 3.4705591  |
| C | 5.4522949  | -2.3493070 | 8.6766978  |
| C | 2.9698170  | 3.1748710  | 6.2229336  |
| C | 4.5678397  | 2.2365672  | 4.7631986  |
| C | 0.4723816  | -0.8257546 | 9.0736018  |
| C | 4.6001638  | -3.2476720 | 5.3034574  |
| C | 0.0560245  | 1.3304607  | 7.2343982  |
| C | 2.1723050  | 0.4125604  | 10.1403882 |
| C | 4.1847892  | -1.0928887 | 3.4645885  |
| C | 6.3001643  | -2.0096791 | 6.3699936  |
| C | 1.7564833  | 2.5685534  | 8.3008657  |
| C | 5.8842093  | 0.1463539  | 4.5304211  |
| C | 0.1827602  | -2.2568749 | 7.0684542  |
| C | 2.1226607  | -3.3960890 | 5.2954145  |
| C | -0.1614767 | -0.4822977 | 5.5540328  |
| C | 4.5756743  | 0.9416625  | 9.8234645  |
| C | 1.7802812  | -1.6217357 | 3.7794169  |
| C | 6.5163764  | -0.1971328 | 8.0505971  |
| C | 4.2335543  | 2.7169456  | 8.3085353  |
| C | 6.1731903  | 1.5774043  | 6.5354837  |
| C | 4.8957248  | 1.0877906  | 4.0196072  |
| C | 1.7544677  | 2.9302593  | 6.8884018  |
| C | 5.6527671  | -2.8441248 | 7.3752138  |
| C | 3.8442756  | 0.3225384  | 3.3604780  |
| C | 2.5127749  | -1.0013486 | 10.2433980 |
| C | 0.7034818  | 2.1651094  | 6.2296245  |
| C | 4.6023063  | -3.6095170 | 6.7161106  |
| C | 1.4615750  | -1.7665152 | 9.5838030  |
| C | 6.5119545  | 0.3871767  | 5.7658266  |
| C | 2.9740209  | 2.4637688  | 8.9981774  |
| C | 6.7240987  | -0.7097519 | 6.7018760  |
| C | 3.1709557  | -2.0460747 | 3.6713027  |
| C | 3.1855132  | 1.3668032  | 9.9342626  |
| C | -0.3683533 | 0.0303108  | 6.9025884  |
| C | 3.3826240  | -3.1430356 | 4.6062261  |
| C | -0.1559445 | -1.0668030 | 7.8383930  |
| C | 5.2186901  | 2.4858739  | 6.0433069  |
| C | 4.2315761  | 3.0660226  | 6.9455455  |
| C | 5.8917711  | -1.0023745 | 9.0206871  |
| C | 1.4527560  | -0.2566492 | 3.6857552  |
| C | 4.9044900  | -0.4228600 | 9.9228900  |

|   |             |            |             |
|---|-------------|------------|-------------|
| C | 0.4646591   | 0.3235571  | 4.5852359   |
| C | 2.1248046   | -3.7449111 | 6.6581974   |
| C | 1.1378850   | -3.1648356 | 7.5604205   |
| C | 1.1328394   | -2.4553776 | 4.7848566   |
| C | 0.1801624   | -1.8958669 | 5.6560339   |
| H | -6.0650875  | 2.7125604  | -10.8532304 |
| H | -1.3800760  | 1.1845181  | -7.5117040  |
| H | 0.0068568   | 0.9586814  | -5.2741936  |
| H | -5.8144573  | 2.6281924  | -13.3634146 |
| S | -4.0092456  | 1.5136000  | -8.9035757  |
| C | -1.8223752  | 0.9159620  | -6.5402518  |
| C | -1.0787253  | 0.7892320  | -5.3413420  |
| C | -6.1216965  | 1.5996433  | -10.7894357 |
| H | -5.5004859  | 2.5977017  | -15.9054685 |
| H | 1.6357431   | 0.8657088  | 0.2323183   |
| C | -5.6302500  | 1.1412700  | -9.4453200  |
| S | 0.2458709   | 0.3403016  | -2.4062605  |
| C | -3.1838603  | 0.6499844  | -6.3848464  |
| C | -5.8886589  | 1.5141855  | -13.3451263 |
| H | -7.2028625  | 1.3429161  | -10.8576885 |
| C | -1.8513408  | 0.4225165  | -4.2377820  |
| C | -4.2444793  | 0.6910043  | -7.3686391  |
| C | -5.3733720  | 0.9973138  | -11.9954969 |
| C | -1.4438404  | 0.2113002  | -2.8654838  |
| H | -4.2858923  | 1.2271622  | -11.9017870 |
| C | -5.5826059  | 1.4853137  | -15.9067990 |
| H | -6.9755877  | 1.2807902  | -13.4450004 |
| C | 0.9716800   | -0.0225886 | 0.3010553   |
| C | -0.1096700  | 0.0157000  | -0.7254500  |
| C | -6.3063718  | 0.4201528  | -8.4722341  |
| S | -3.5325054  | 0.2434094  | -4.7131173  |
| C | -5.5336142  | 0.1652119  | -7.3042301  |
| C | -5.1289946  | 0.9382520  | -14.5462370 |
| H | -4.0388282  | 1.1442651  | -14.4187616 |
| H | -6.6666390  | 1.2663216  | -16.0579095 |
| C | -2.2232074  | -0.0904036 | -1.7476595  |
| H | 0.5082800   | -0.0247917 | 1.3114517   |
| C | -1.4683454  | -0.2036647 | -0.5484934  |
| H | -5.0890975  | 1.3692217  | -18.0418736 |
| C | -4.7730619  | 0.9177443  | -17.0769111 |
| H | -3.6856092  | 1.1222917  | -16.9498139 |
| H | -7.3464061  | 0.0841890  | -8.6057475  |
| H | 3.0804600   | -1.0703047 | 0.8558330   |
| H | -3.3153472  | -0.2178138 | -1.8011185  |
| H | -5.8994181  | -0.4026978 | -6.4349046  |
| S | 2.0282503   | -1.5392970 | 0.1134278   |
| H | -5.4546791  | -0.1137828 | -11.9554163 |
| H | -1.9047409  | -0.4347481 | 0.4356666   |
| H | -5.2270602  | -0.1741923 | -14.5452561 |
| H | -4.8958974  | -0.1867399 | -17.1560598 |
| H | -11.7860250 | 5.1898952  | -16.0268700 |
| H | -18.5926865 | 1.6635340  | -12.5921539 |
| H | -5.1535970  | 8.2423002  | -19.0021217 |
| H | -19.3799083 | 1.6577121  | -14.1996120 |
| C | -18.9567699 | 0.9988644  | -13.4079196 |
| C | -12.1487150 | 4.1407320  | -16.0485265 |
| H | -6.5915936  | 7.2386428  | -19.3902449 |

|   |             |            |             |
|---|-------------|------------|-------------|
| H | -13.1385820 | 4.1368388  | -16.5597800 |
| C | -5.5341566  | 7.1999917  | -19.0424890 |
| H | -12.3278743 | 3.8203689  | -14.9972206 |
| H | -19.7862224 | 0.3842989  | -12.9992387 |
| H | -5.5510789  | 6.8059427  | -18.0007238 |
| H | -16.4458642 | 1.7259108  | -14.6460102 |
| H | -9.7262165  | 4.8152660  | -17.3856979 |
| H | -3.2062558  | 7.9096898  | -20.5194546 |
| C | -17.8467300 | 0.1373300  | -13.9485700 |
| C | -11.1562079 | 3.2500067  | -16.7459431 |
| C | -16.6527600 | 0.6486300  | -14.5425100 |
| C | -9.9814921  | 3.7440955  | -17.3694868 |
| C | -4.6764948  | 6.3565353  | -19.9470172 |
| C | -3.5340609  | 6.8629514  | -20.6193728 |
| S | -13.8124497 | 1.4921550  | -15.6960936 |
| S | -7.2016281  | 4.5636349  | -18.6710842 |
| S | -0.8410700  | 7.7106500  | -22.0794500 |
| C | -17.8547164 | -1.2495278 | -13.9473804 |
| C | -11.2811371 | 1.8537275  | -16.8793970 |
| C | -15.7510068 | -0.3296243 | -14.9697894 |
| C | -4.8992011  | 4.9960176  | -20.2343451 |
| C | -9.1850382  | 2.7773565  | -17.9922541 |
| C | -2.8554013  | 5.9407419  | -21.4201074 |
| C | -12.3169912 | 0.9482012  | -16.4434995 |
| H | -18.6428738 | -1.9164591 | -13.5708879 |
| C | -14.4428610 | -0.1417965 | -15.5620853 |
| C | -5.9338277  | 4.0920759  | -19.7938299 |
| C | -7.9606180  | 2.9785779  | -18.7279291 |
| H | 1.2050720   | 7.9204683  | -23.4407526 |
| C | 0.3988934   | 7.2220911  | -23.1780342 |
| C | -1.6548903  | 6.1545401  | -22.1998726 |
| S | -16.4252100 | -1.9255000 | -14.6473000 |
| S | -9.9178951  | 1.1946046  | -17.7741163 |
| S | -3.6689682  | 4.3873948  | -21.3324764 |
| C | -12.3409794 | -0.4449388 | -16.5572180 |
| C | -13.5183167 | -1.0721252 | -16.0712549 |
| C | -6.1131595  | 2.7522453  | -20.1543382 |
| C | 0.2052600   | 5.9274900  | -23.6172200 |
| C | -7.2338535  | 2.1113250  | -19.5663057 |
| C | -0.9629500  | 5.3021700  | -23.0779600 |
| H | -11.5059407 | -1.0152687 | -16.9940790 |
| H | 0.8813968   | 5.4213832  | -24.3235780 |
| H | -5.4337512  | 2.2332233  | -20.8484638 |
| C | -13.7210218 | -2.5628201 | -16.1071925 |
| C | -1.3680593  | 3.8926129  | -23.4159346 |
| H | -2.4085768  | 3.8405178  | -23.8089542 |
| C | -7.5762894  | 0.6688544  | -19.8207263 |
| H | -14.6475768 | -2.8431967 | -16.6578357 |
| H | -13.8119471 | -2.9941595 | -15.0838519 |
| H | -8.6249532  | 0.5446203  | -20.1726956 |
| H | -7.4683698  | 0.0540386  | -18.8979386 |
| H | -1.3258550  | 3.2228853  | -22.5263665 |
| H | -0.6931645  | 3.4663999  | -24.1881172 |
| H | -12.8647905 | -3.0623344 | -16.6074107 |
| H | -6.9032375  | 0.2366353  | -20.5908281 |

Cartesian coordinates of the extended thiophene trimer optimized using the PBE/SV(P) method

|   |             |            |            |
|---|-------------|------------|------------|
| C | -11.1836400 | -1.8013000 | 0.8684000  |
| C | -10.6280537 | -0.9349744 | -0.0601851 |
| C | -9.2104831  | -0.8741190 | -0.0092520 |
| C | -8.6575407  | -1.6954616 | 0.9697816  |
| S | -9.9306216  | -2.5398714 | 1.8364912  |
| C | -4.7434830  | -1.8515110 | 1.3130245  |
| C | -5.2863454  | -2.6852699 | 2.2943348  |
| C | -6.7015258  | -2.7179561 | 2.2846980  |
| C | -7.2691183  | -1.9095701 | 1.2957100  |
| S | -6.0186260  | -1.0985222 | 0.3772771  |
| C | -12.6333596 | -2.0909184 | 1.1389842  |
| C | -13.1900418 | -1.3834968 | 2.3926525  |
| C | -14.7155996 | -1.4668327 | 2.5311569  |
| C | -15.2635755 | -0.5392801 | 3.6233554  |
| C | -16.7941829 | -0.4963806 | 3.7222655  |
| C | -17.2952849 | 0.4899346  | 4.7814011  |
| C | -0.8433000  | -1.4757200 | 0.9899200  |
| C | -1.4250306  | -0.7765564 | -0.0564032 |
| C | -2.8417784  | -0.8332735 | -0.0558998 |
| C | -3.3628855  | -1.5750822 | 1.0026232  |
| S | -2.0662728  | -2.1969362 | 2.0107940  |
| C | 0.6108229   | -1.6244486 | 1.2776245  |
| S | 1.0615344   | -0.8329834 | 2.8986998  |
| C | -11.5693900 | 2.3395800  | 1.5824900  |
| C | -11.0067493 | 1.7552171  | 2.7077908  |
| C | -9.5886583  | 1.6543270  | 2.6574829  |
| C | -9.0390962  | 2.1688125  | 1.4856090  |
| S | -10.3163842 | 2.7831442  | 0.4447472  |
| C | -5.1162140  | 2.2670912  | 1.0711936  |
| C | -5.6836447  | 2.5164018  | -0.1800481 |
| C | -7.1010226  | 2.5051149  | -0.1713551 |
| C | -7.6506252  | 2.2510946  | 1.0874077  |
| S | -6.3737759  | 2.0459603  | 2.2731853  |
| C | -13.0274416 | 2.5248277  | 1.2602135  |
| C | -13.5281891 | 1.6145858  | 0.1164277  |
| C | -15.0543059 | 1.4717974  | 0.0347400  |
| C | -15.4954247 | 0.3941661  | -0.9677659 |
| C | -16.9754994 | -0.0033645 | -0.8797526 |
| C | -17.3287767 | -1.1769048 | -1.7985268 |
| C | -1.1970700  | 2.2836200  | 1.4645700  |
| C | -1.7247741  | 1.5914280  | 2.5450929  |
| C | -3.1449950  | 1.5281360  | 2.5391377  |
| C | -3.7209193  | 2.1674215  | 1.4420365  |
| S | -2.4759110  | 2.8703974  | 0.4228568  |
| C | 0.2404968   | 2.5462605  | 1.1495144  |
| S | 0.6056704   | 2.1445536  | -0.6269353 |
| H | -11.2348222 | -0.3615929 | -0.7757143 |
| H | -8.5965520  | -0.2506818 | -0.6757671 |
| H | -4.6623365  | -3.2628642 | 2.9935631  |
| H | -7.3077674  | -3.3183997 | 2.9801406  |
| H | -12.8075971 | -3.1895281 | 1.2185077  |
| H | -13.2130485 | -1.7531682 | 0.2497874  |

|   |             |            |            |
|---|-------------|------------|------------|
| H | -12.8835261 | -0.3159107 | 2.3444880  |
| H | -12.6960593 | -1.7972721 | 3.3020750  |
| H | -15.0278434 | -2.5186815 | 2.7330066  |
| H | -15.1861986 | -1.1932131 | 1.5575580  |
| H | -14.8894149 | 0.4964866  | 3.4327562  |
| H | -14.8365576 | -0.8344004 | 4.6115817  |
| H | -17.1799526 | -1.5199515 | 3.9431468  |
| H | -17.2219346 | -0.2221820 | 2.7281407  |
| H | -16.9597887 | 1.5269682  | 4.5532705  |
| H | -16.9077486 | 0.2289807  | 5.7925385  |
| H | -18.4048337 | 0.5076350  | 4.8360449  |
| H | -0.8278033  | -0.2411477 | -0.8078000 |
| H | -3.4781843  | -0.3545432 | -0.8146993 |
| H | 0.9181012   | -2.6919377 | 1.3288492  |
| H | 1.1833124   | -1.1322343 | 0.4631718  |
| H | 2.3231702   | -1.3641601 | 2.9709948  |
| H | -11.6152876 | 1.3989729  | 3.5529410  |
| H | -8.9743664  | 1.1947647  | 3.4466354  |
| H | -5.0745240  | 2.6698329  | -1.0838720 |
| H | -7.7227585  | 2.6599296  | -1.0665334 |
| H | -13.2533321 | 3.5904496  | 1.0222821  |
| H | -13.5962054 | 2.2875332  | 2.1879853  |
| H | -13.0881289 | 0.6061446  | 0.2695638  |
| H | -13.1202391 | 1.9760032  | -0.8559272 |
| H | -15.5255077 | 2.4503045  | -0.2201416 |
| H | -15.4410156 | 1.2011841  | 1.0457199  |
| H | -14.8810155 | -0.5235468 | -0.7979803 |
| H | -15.2543385 | 0.7215724  | -2.0069703 |
| H | -17.6205548 | 0.8759729  | -1.1164413 |
| H | -17.2179887 | -0.2765079 | 0.1749699  |
| H | -16.6890450 | -2.0613339 | -1.5774127 |
| H | -17.1699212 | -0.9220263 | -2.8709326 |
| H | -18.3855339 | -1.4981473 | -1.6773895 |
| H | -1.0909096  | 1.1177517  | 3.3089480  |
| H | -3.7402415  | 0.9820032  | 3.2863997  |
| H | 0.5051792   | 3.6156979  | 1.3047646  |
| H | 0.8721973   | 1.9162720  | 1.8129597  |
| H | 1.7842739   | 2.8388198  | -0.6955249 |
| S | 2.1008674   | -3.7497279 | -3.7551390 |
| C | 1.4641516   | -3.1744107 | -2.1094144 |
| C | 0.0103000   | -3.4659800 | -1.9524600 |
| C | -0.6028088  | -4.2642077 | -0.9970881 |
| S | -1.1854151  | -2.7247679 | -2.9922592 |
| C | -2.0211552  | -4.2561401 | -1.0732055 |
| C | -2.5139856  | -3.4533116 | -2.1021040 |
| C | -3.8861906  | -3.1641477 | -2.4515816 |
| C | -4.3939970  | -2.1785958 | -3.3012866 |
| S | -5.2022998  | -4.0839479 | -1.7413648 |
| C | -5.8086170  | -2.1565534 | -3.3640183 |
| C | -6.4200915  | -3.1242832 | -2.5626608 |
| C | -7.8255655  | -3.3711248 | -2.3329328 |
| C | -8.4291664  | -4.2193183 | -1.4041708 |
| S | -9.0616166  | -2.5156309 | -3.2426437 |
| C | -9.8483047  | -4.1676285 | -1.4271811 |
| C | -10.3602900 | -3.2789400 | -2.3618400 |
| C | -11.7993185 | -2.9221539 | -2.6168493 |
| C | -12.6445741 | -4.0008189 | -3.3247475 |

|   |             |            |            |
|---|-------------|------------|------------|
| C | -14.1367337 | -3.6386259 | -3.3478335 |
| C | -15.0226921 | -4.6603378 | -4.0725433 |
| C | -16.5202272 | -4.3214167 | -4.0396368 |
| C | -17.3908640 | -5.3165706 | -4.8126488 |
| H | -10.4905758 | -4.7422903 | -0.7427097 |
| H | -7.8474717  | -4.8320984 | -0.6984946 |
| H | -3.7446003  | -1.4762789 | -3.8465629 |
| H | -6.3845989  | -1.4344855 | -3.9626161 |
| H | -11.8589453 | -1.9716630 | -3.1933065 |
| H | -12.2671983 | -2.7053949 | -1.6293431 |
| H | -12.5047996 | -4.9755993 | -2.8026241 |
| H | -12.2658173 | -4.1502685 | -4.3620074 |
| H | -14.2677845 | -2.6357375 | -3.8214326 |
| H | -14.4966509 | -3.5189170 | -2.2970629 |
| H | -14.8654863 | -5.6708330 | -3.6238819 |
| H | -14.6884496 | -4.7477492 | -5.1341144 |
| H | -16.6724985 | -3.2943647 | -4.4486819 |
| H | -16.8659579 | -4.2719137 | -2.9802438 |
| H | -17.2939776 | -6.3470454 | -4.4015212 |
| H | -17.1003427 | -5.3606210 | -5.8872386 |
| H | -18.4666505 | -5.0424950 | -4.7658156 |
| H | -0.0318175  | -4.8253548 | -0.2410971 |
| H | -2.6783559  | -4.7937069 | -0.3733188 |
| H | 1.6697488   | -2.0826467 | -2.0307753 |
| H | 2.0232962   | -3.6842812 | -1.2956407 |
| H | 3.3095577   | -3.1127590 | -3.6560118 |
| C | 9.1574028   | -8.4794361 | -7.1400158 |
| C | 10.3317258  | -1.7052475 | 0.1228037  |
| C | 8.8055288   | -7.9830529 | -5.8711388 |
| C | 9.5562353   | 5.4688672  | 10.0264681 |
| C | 10.0373595  | -1.4970543 | 1.4830597  |
| C | 9.6468234   | 4.3986799  | 9.1180708  |
| C | 10.2095159  | 6.7367649  | 9.7267548  |
| C | 8.2049047   | -9.2794774 | -7.8997885 |
| C | 9.5199693   | -2.6223437 | -0.6670594 |
| C | 10.3932982  | 4.5582969  | 7.8763776  |
| C | 7.4879902   | -8.2690757 | -5.3166526 |
| C | 8.9188834   | -2.1986983 | 2.1016001  |
| C | 10.9301566  | 6.8909313  | 8.5280402  |
| C | 11.0234532  | 5.7825605  | 7.5864837  |
| C | 9.8834939   | -7.6321872 | -8.0783448 |
| C | 10.6906754  | -0.5753959 | -0.7258458 |
| C | 9.1670797   | -6.6213848 | -5.4952394 |
| C | 10.0923234  | -0.1533029 | 2.0433063  |
| C | 6.9331889   | -9.5553217 | -7.3646295 |
| C | 8.4404212   | -3.3004986 | -0.0700436 |
| C | 8.2897372   | 5.7593213  | 10.6870892 |
| C | 6.5682774   | -9.0410245 | -6.0503692 |
| C | 8.1345436   | -3.0841364 | 1.3390741  |
| C | 8.4736738   | 3.5802416  | 8.8369500  |
| C | 9.3463379   | 7.8113014  | 10.2018497 |
| C | 8.3423221   | -8.9267367 | -9.3074649 |
| C | 9.3773503   | -2.0584633 | -2.0039110 |
| C | 10.2322454  | -6.3180929 | -7.7155553 |
| C | 10.7439800  | 0.7227000  | -0.1847400 |
| C | 9.8680953   | -5.8035430 | -6.4013039 |
| C | 10.4400845  | 0.9379636  | 1.2240825  |

|   |            |            |             |
|---|------------|------------|-------------|
| C | 9.3795861  | -7.9089471 | -9.4177292  |
| C | 10.1019380 | -0.7944896 | -2.0409426  |
| C | 9.6818023  | 3.8386069  | 6.8276630   |
| C | 7.0350701  | -7.0842962 | -4.5980375  |
| C | 8.2819093  | -1.2878226 | 3.0445939   |
| C | 8.1598682  | 7.2070349  | 10.7952382  |
| C | 8.0732032  | -6.0667030 | -4.7083075  |
| C | 9.0067561  | -0.0234834 | 3.0076212   |
| C | 7.1572452  | 4.9697138  | 10.4153551  |
| C | 7.2507753  | 3.8609635  | 9.4741197   |
| C | 10.8133600 | 8.1254100  | 7.7607500   |
| C | 8.4953566  | 3.2334766  | 7.4213313   |
| C | 10.9652638 | 6.3317795  | 6.2372625   |
| C | 5.7528692  | -9.4889099 | -8.2179830  |
| C | 7.1798038  | -3.4394832 | -0.7877211  |
| C | 5.1623341  | -8.6570522 | -6.0917272  |
| C | 6.6845164  | -3.0892158 | 1.4917979   |
| C | 9.2335046  | 9.0024329  | 9.4615757   |
| C | 7.2036048  | -8.8626897 | -10.1311818 |
| C | 8.1601421  | -2.1908328 | -2.6958814  |
| C | 10.8344934 | 7.7799498  | 6.3452609   |
| C | 9.9799607  | 9.1620261  | 8.2195166   |
| C | 9.6246287  | 4.3698592  | 5.5260917   |
| C | 5.6782628  | -6.7131070 | -4.6397140  |
| C | 10.0895132 | -5.2337850 | -8.6796075  |
| C | 6.8825642  | -1.2933205 | 3.1931706   |
| C | 10.2078001 | 1.8483340  | -0.9408609  |
| C | 9.2422077  | -6.8625448 | -10.3479320 |
| C | 9.5848043  | 0.2921498  | -2.7711058  |
| C | 10.2778815 | 5.6377394  | 5.2245239   |
| C | 9.4999808  | -4.4010423 | -6.5537225  |
| C | 9.7146358  | 2.1969050  | 1.3390107   |
| C | 5.8857579  | -9.1488755 | -9.5770893  |
| C | 7.0426162  | -2.8908652 | -2.0756956  |
| C | 4.6590050  | -8.9330885 | -7.4312474  |
| C | 6.9021595  | 7.8148737  | 10.6278677  |
| C | 6.0944210  | -3.3081422 | 0.1770821   |
| C | 7.7167491  | -4.7141470 | -4.8593967  |
| C | 8.3058540  | 1.1909629  | 3.1174197   |
| C | 4.7255127  | -7.5128210 | -5.3996309  |
| C | 6.0697803  | -2.2099171 | 2.4027455   |
| C | 5.8541810  | 5.5995766  | 10.2423698  |
| C | 6.0044944  | 3.8053863  | 8.7191224   |
| C | 7.2923010  | 3.1816564  | 6.6928354   |
| C | 9.6039500  | -5.5013100 | -9.9727900  |
| C | 9.6384656  | 1.6366633  | -2.2104238  |
| C | 8.4431934  | -3.8655725 | -5.7954617  |
| C | 8.6655077  | 2.3199902  | 2.2682073   |
| C | 9.6373029  | -4.0488912 | -7.9616126  |
| C | 9.5712768  | 2.7597998  | 0.0009494   |
| C | 5.7292054  | 6.9968056  | 10.3465977  |
| C | 7.9304645  | 9.6320635  | 9.2883404   |
| C | 7.0610088  | -7.7783620 | -11.0947265 |
| C | 7.6243021  | -1.0666563 | -3.4537868  |
| C | 6.0244502  | 3.4714686  | 7.3524234   |
| C | 8.0626778  | -6.7961831 | -11.2014148 |
| C | 8.3246566  | 0.1538283  | -3.4904657  |



|   |            |            |             |
|---|------------|------------|-------------|
| C | 6.7854022  | 9.0489330  | 9.8611903   |
| C | 10.0220544 | 8.4833448  | 5.4370442   |
| C | 5.1416412  | 4.8802043  | 9.1935270   |
| C | 8.3781191  | 4.3182254  | 4.7744935   |
| C | 5.3103810  | -5.3116915 | -4.7940641  |
| C | 6.1570928  | -0.0339623 | 3.3091904   |
| C | 9.1382131  | 9.8906465  | 7.2790724   |
| C | 6.3115388  | -4.3312631 | -4.9030753  |
| C | 6.8573492  | 1.1865177  | 3.2714256   |
| C | 7.2336052  | 3.7353631  | 5.3472878   |
| C | 9.4353752  | 6.3670702  | 4.2835847   |
| C | 3.7360064  | -8.0563533 | -8.0305855  |
| C | 4.9082010  | -2.6408665 | -0.1822535  |
| C | 4.9292811  | -8.2406009 | -10.1980335 |
| C | 5.8167605  | -2.1982488 | -2.4482524  |
| C | 3.7682181  | -6.6054759 | -6.0200755  |
| C | 4.8424582  | -1.5166473 | 2.0308384   |
| C | 7.8713622  | 10.1812646 | 7.9396594   |
| C | 9.1587939  | 9.5572677  | 5.9121920   |
| C | 9.3098715  | 7.7645453  | 4.3873667   |
| C | 8.6470727  | -4.5933771 | -10.5934681 |
| C | 8.4113400  | 2.3292423  | -2.5829029  |
| C | 5.6554155  | -7.3940017 | -11.1365731 |
| C | 6.1752052  | -1.0707460 | -3.3004144  |
| C | 8.2611726  | 5.5507007  | 4.0055833   |
| C | 8.7136655  | -3.1726485 | -8.5607671  |
| C | 8.3867030  | 3.4286984  | -0.3588663  |
| C | 7.4868414  | -2.9560408 | -6.4156440  |
| C | 7.4383779  | 3.0105409  | 1.8935270   |
| C | 3.8735937  | -7.7041859 | -9.4382056  |
| C | 4.8869944  | 7.7254585  | 9.4059038   |
| C | 4.7674147  | -2.0752441 | -1.5193432  |
| C | 4.1291135  | -5.2442973 | -5.6449343  |
| C | 4.8971804  | -0.1712644 | 2.5902670   |
| C | 3.2828258  | -6.8718399 | -7.3125249  |
| C | 7.6946611  | -5.3935843 | -11.3531091 |
| C | 4.2732426  | -1.7275322 | 0.7592095   |
| C | 7.5985680  | 1.4126418  | -3.3736270  |
| C | 5.5401402  | 8.9935397  | 9.1058025   |
| C | 5.1821837  | 4.2001275  | 6.4113934   |
| C | 4.3287229  | 5.5830632  | 8.2853354   |
| C | 6.1688395  | -3.2431017 | -5.8629590  |
| C | 6.3208749  | 2.3108626  | 2.5132896   |
| C | 5.9300398  | 4.3625784  | 5.1709173   |
| C | 8.2100420  | -3.4496820 | -9.9002225  |
| C | 7.7967573  | 3.2096958  | -1.6733710  |
| C | 7.6201165  | -2.6150455 | -7.7745881  |
| C | 7.3009656  | 3.5588539  | 0.6055824   |
| C | 4.1992809  | 7.0312030  | 8.3934255   |
| C | 6.6691980  | 10.1277950 | 7.2102164   |
| C | 4.3488077  | 5.2372381  | 6.8695181   |
| C | 7.9129570  | 9.5018970  | 5.1565860   |
| C | 8.0066610  | 8.3941052  | 4.2141648   |
| C | 5.3000276  | -6.0401761 | -11.2827520 |
| C | 5.4737318  | 0.1435729  | -3.1899189  |
| C | 7.0032705  | 6.1569186  | 3.8346616   |
| C | 6.3381129  | -5.0223431 | -11.3929471 |

|   |             |            |             |
|---|-------------|------------|-------------|
| C | 6.1990640   | 1.4078412  | -3.2269123  |
| C | 5.4829514   | 9.5230340  | 7.8036839   |
| C | 3.9915477   | -4.1964623 | -6.5751833  |
| C | 4.3777656   | 0.9150742  | 1.8603626   |
| C | 3.5048803   | -6.3016517 | -9.5901019  |
| C | 4.0393574   | -0.8164905 | -1.4051166  |
| C | 3.1388458   | -5.7871177 | -8.2766508  |
| C | 3.7374414   | -0.6008815 | 0.0049045   |
| C | 5.0296004   | -3.1793537 | -6.6856286  |
| C | 5.1024686   | 2.1796186  | 1.8231549   |
| C | 5.8161806   | 5.5521202  | 4.4279254   |
| C | 6.6904580   | 9.7819260  | 5.7943177   |
| C | 6.8045930   | -3.0646761 | -9.9417238  |
| C | 6.3467325   | 3.2043484  | -1.5206970  |
| C | 6.8735580   | 7.6044206  | 3.9424362   |
| C | 6.4396797   | -2.5492627 | -8.6276919  |
| C | 6.0405652   | 3.4210252  | -0.1118867  |
| C | 4.2055404   | -5.4844323 | -10.4969802 |
| C | 4.3882874   | 0.2737884  | -2.2255278  |
| C | 3.4882418   | -4.4732968 | -7.9140456  |
| C | 4.1403209   | 7.5800415  | 7.0441391   |
| C | 3.7894696   | 0.6959217  | 0.5466306   |
| C | 4.2320154   | 6.4717198  | 6.1020767   |
| C | 5.8851552   | -3.8375296 | -10.6747506 |
| C | 5.5628717   | 2.3184866  | -2.2832349  |
| C | 4.7710627   | 8.8039231  | 6.7548139   |
| C | 5.1674391   | -2.8256805 | -8.0929645  |
| C | 4.9606138   | 2.7433709  | 0.4864612   |
| C | 4.9527704   | 6.6263167  | 4.9028909   |
| C | 5.5170939   | 8.9639507  | 5.5129168   |
| C | 5.6066054   | 7.8946353  | 4.6033368   |
| C | 4.5670398   | -4.1230497 | -10.1212091 |
| C | 4.4462054   | 1.6165264  | -1.6637600  |
| C | 4.2149938   | -3.6263419 | -8.8524485  |
| C | 4.1505670   | 1.8247907  | -0.3033458  |
| H | -20.2178456 | -3.3929785 | 3.9993590   |
| H | -21.7697439 | 2.2355618  | 10.2486412  |
| H | -20.7638900 | -8.5601897 | -1.9247999  |
| H | -19.9813436 | 2.2360913  | 10.1769725  |
| C | -20.8846936 | 2.8588567  | 9.9882954   |
| C | -20.5018430 | -2.3194401 | 3.9941803   |
| H | -19.8519499 | -7.0715306 | -1.5019966  |
| H | -19.7267670 | -1.7556093 | 4.5589788   |
| C | -20.7997124 | -7.4505852 | -1.9486624  |
| H | -21.4538582 | -2.2233742 | 4.5643178   |
| H | -20.8567005 | 3.7189438  | 10.6899446  |
| H | -21.6265397 | -7.1235995 | -1.2780170  |
| H | -20.9302721 | 1.3409851  | 7.5247788   |
| H | -20.5939098 | -3.7718387 | 1.5462718   |
| H | -20.9634896 | -8.9196089 | -4.3908134  |
| C | -20.9415000 | 3.3185700  | 8.5557400   |
| C | -20.6390249 | -1.8160921 | 2.5819187   |
| C | -20.9780400 | 2.4377600  | 7.4321000   |
| C | -20.6656403 | -2.6765392 | 1.4540573   |
| C | -20.9889277 | -6.9558962 | -3.3570312  |
| C | -21.0532368 | -7.8256116 | -4.4795704  |
| S | -21.1603441 | 0.7442222  | 4.7260452   |

|   |             |             |             |
|---|-------------|-------------|-------------|
| S | -20.8121854 | -4.4018051  | -1.1950095  |
| S | -21.7472200 | -9.4627800  | -7.2127900  |
| C | -20.9793919 | 4.6463665   | 8.1561293   |
| C | -20.7420844 | -0.4612465  | 2.2153027   |
| C | -20.9832367 | 3.0796253   | 6.1909776   |
| C | -21.0867973 | -5.6012442  | -3.7288249  |
| C | -20.7946076 | -2.0369650  | 0.2159000   |
| C | -21.1896142 | -7.1897041  | -5.7144742  |
| C | -20.7421962 | 0.7401190   | 3.0185387   |
| H | -20.9755427 | 5.5410413   | 8.7944648   |
| C | -20.9046334 | 2.4771689   | 4.8742916   |
| C | -21.0283859 | -4.3933492  | -2.9393002  |
| C | -20.8862087 | -2.6478643  | -1.0884891  |
| H | -21.5459379 | -10.3699209 | -9.4980782  |
| C | -21.3838998 | -9.4623635  | -8.9006786  |
| C | -21.2351084 | -7.7870168  | -7.0349723  |
| S | -21.0291000 | 4.8244300   | 6.4370400   |
| S | -20.8803432 | -0.2989098  | 0.4700946   |
| S | -21.2746703 | -5.4539774  | -5.4704458  |
| C | -20.4665945 | 2.0468124   | 2.6090745   |
| C | -20.5549058 | 3.0323105   | 3.6297516   |
| C | -21.1317657 | -3.0704860  | -3.3832217  |
| C | -20.9144600 | -8.2321000  | -9.3178200  |
| C | -21.0585372 | -2.0821980  | -2.3677128  |
| C | -20.8435600 | -7.2561300  | -8.2742700  |
| H | -20.1685395 | 2.2868640   | 1.5760847   |
| H | -20.6269333 | -8.0164373  | -10.3586861 |
| H | -21.2702414 | -2.8146455  | -4.4456461  |
| C | -20.2548722 | 4.4862624   | 3.3816351   |
| C | -20.3397298 | -5.8547390  | -8.4999769  |
| H | -19.5657764 | -5.5669260  | -7.7533231  |
| C | -21.1679299 | -0.6084615  | -2.6527206  |
| H | -19.4848893 | 4.8766241   | 4.0847357   |
| H | -21.1578599 | 5.1256900   | 3.5076564   |
| H | -20.2577660 | -0.0529751  | -2.3298203  |
| H | -22.0330213 | -0.1474653  | -2.1240414  |
| H | -21.1557628 | -5.0998229  | -8.4262215  |
| H | -19.8934316 | -5.7599247  | -9.5125233  |
| H | -19.8814141 | 4.6359961   | 2.3466792   |
| H | -21.3018960 | -0.4296959  | -3.7402951  |

## References

1. J. P. Perdew, K. Burke and M. Ernzerhof, *Phys. Rev. Lett.*, 1996, **77**, 3865-3868.
2. A. Schäfer, H. Horn and R. Ahlrichs, *J. Chem. Phys.*, 1992, **97**, 2571-2577.
3. C. Hättig and F. Weigend, *J. Chem. Phys.*, 2000, **113**, 5154-5161.
4. S. Grimme, J. Antony, S. Ehrlich and H. Krieg, *J. Chem. Phys.*, 2010, **132**, 154104.
5. R. Ditchfield, W. J. Hehre and J. A. Pople, *J. Chem. Phys.*, 1971, **54**, 724-728.
6. G. A. Petersson, A. Bennett, T. G. Tensfeldt, M. A. Al-Laham, W. A. Shirley and J. Mantzaris, *J. Chem. Phys.*, 1988, **89**, 2193-2218.
7. G. A. Petersson and M. A. Al-Laham, *J. Chem. Phys.*, 1991, **94**, 6081-6090.
8. M. Cossi, N. Rega, G. Scalmani and V. Barone, *J. Comput. Chem.*, 2003, **24**, 669-681.
9. E. Runge and E. K. U. Gross, *Phys. Rev. Lett.*, 1984, **52**, 997-1000.
10. M. Petersilka, U. J. Gossmann and E. K. U. Gross, *Phys. Rev. Lett.*, 1996, **76**, 1212-1215.
11. R. Improta, V. Barone, G. Scalmani and M. J. Frisch, *J. Chem. Phys.*, 2006, **125**, 054103.
12. S. Corni, R. Cammi, B. Mennucci and J. Tomasi, *J. Chem. Phys.*, 2005, **123**, 134512.
13. R. Cammi, S. Corni, B. Mennucci and J. Tomasi, *J. Chem. Phys.*, 2005, **122**, 104513.
14. M. Caricato, *J. Chem. Phys.*, 2013, **139**, 044116.
